# Supplementary material for: Inhibition of microbiota-dependent TMAO production attenuates chronic kidney disease in mice
Source: PubMed Central journal article supplement (PMC7804188; doi:10.1038/s41598-020-80063-0), 2021-01-12

## Supplemental information

**Title:** Inhibition of microbiota-dependent TMAO production attenuates chronic kidney disease in mice

### **Authors**

Wenchao Zhang, Aika Miikeda, Jonathan Zuckerman, Xun Jia, Sarada Charugundla, Zhiqiang Zhou, Karolina Elżbieta Kaczor-Urbanowicz, Clara Magyar, Fangfei Guo, Zeneng Wang, Matteo Pellegrini, Stanley L. Hazen, Susanne B. Nicholas, Aldons J. Luscis, and Diana M. Shih

**Supplemental Table S1.** DAVID pathway analysis-enriched clusters of down-regulated genes in the kidney samples of Ade + IMC group compared to Ade group

| Enrichment Cluster              | Gene     | log2 Fold Change | P value  |
|---------------------------------|----------|------------------|----------|
| Extracellular matrix (30 genes) | Adamts1  | -0.52            | 1.21E-02 |
|                                 | Adamts16 | -0.73            | 9.48E-03 |
|                                 | Adamts4  | -0.50            | 1.14E-02 |
|                                 | Ctsd     | -0.29            | 3.59E-02 |
|                                 | Clu      | -0.58            | 1.84E-02 |
|                                 | Col3a1   | -0.40            | 4.45E-03 |
|                                 | Col4a1   | -0.32            | 1.78E-02 |
|                                 | Col5a2   | -0.28            | 1.81E-02 |
|                                 | Col8a1   | -0.48            | 1.01E-02 |
|                                 | Col12a1  | -0.36            | 4.13E-02 |
|                                 | Col15a1  | -0.38            | 3.83E-03 |
|                                 | Fbn2     | -0.58            | 1.62E-02 |
|                                 | Lama1    | -0.31            | 2.68E-02 |
|                                 | Ltbp2    | -0.63            | 8.38E-03 |
|                                 | Lgals3   | -0.40            | 3.45E-02 |
|                                 | Mmp12    | -1.21            | 8.59E-05 |
|                                 | Mmp14    | -0.30            | 2.22E-02 |
|                                 | Mmp20    | -2.89            | 1.62E-02 |
|                                 | Mmp24    | -1.31            | 3.61E-02 |
|                                 | Mmp7     | -0.98            | 1.01E-02 |
|                                 | Rps25    | -0.32            | 3.54E-02 |
|                                 | Rps5     | -0.21            | 4.46E-02 |
|                                 | Serpine1 | -0.70            | 4.01E-02 |
|                                 | Serpine2 | -0.31            | 1.86E-03 |
|                                 | Sbsn     | -0.71            | 5.48E-03 |
|                                 | Tnc      | -0.43            | 1.71E-02 |
|                                 | Timp1    | -0.84            | 1.54E-02 |
|                                 | Tgfb1    | -0.38            | 4.74E-02 |
|                                 | Tgm2     | -0.32            | 8.53E-03 |
|                                 | Vcan     | -0.61            | 1.42E-02 |

Supplemental Table S1- continued

| Enrichment Cluster            | Gene      | log2 Fold Change | P value  |
|-------------------------------|-----------|------------------|----------|
| Protease inhibitor (13 genes) | Cstb      | -0.37            | 1.81E-02 |
|                               | Gpc3      | -1.05            | 1.13E-04 |
|                               | Lxn       | -0.50            | 8.20E-03 |
|                               | Ngf       | -0.54            | 8.84E-04 |
|                               | Serpina10 | -1.07            | 1.66E-03 |
|                               | Serpina1b | -1.06            | 8.91E-03 |
|                               | Serpinb1a | -0.32            | 4.58E-03 |
|                               | Serpinb6a | -0.31            | 6.35E-03 |
|                               | Serpinb8  | -0.40            | 1.22E-02 |
|                               | Serpine1  | -0.70            | 4.01E-02 |
|                               | Serpine2  | -0.31            | 1.86E-03 |
|                               | Timp1     | -0.84            | 1.54E-02 |
|                               | Wfdc2     | -0.39            | 2.67E-02 |

| Enrichment Cluster                            | Gene      | log2 Fold Change | P value  |
|-----------------------------------------------|-----------|------------------|----------|
| Complement and coagulation cascade (12 genes) | C2        | -0.29            | 3.53E-02 |
|                                               | C3        | -0.59            | 2.82E-02 |
|                                               | C3ar1     | -0.32            | 2.56E-02 |
|                                               | Cfi       | -1.16            | 4.46E-05 |
|                                               | F10       | -0.75            | 3.66E-02 |
|                                               | F5        | -1.09            | 3.29E-05 |
|                                               | F7        | -0.83            | 4.98E-02 |
|                                               | Fgb       | -1.30            | 4.05E-02 |
|                                               | Mbl1      | -0.84            | 2.09E-02 |
|                                               | Pros1     | -0.18            | 2.60E-02 |
|                                               | Serpina1b | -1.06            | 8.91E-03 |
|                                               | Serpine1  | -0.70            | 4.01E-02 |

| Enrichment Cluster  | Gene    | log2 Fold Change | P value  |
|---------------------|---------|------------------|----------|
| Immunity (24 genes) | C2      | -0.29            | 3.53E-02 |
|                     | C3      | -0.59            | 2.82E-02 |
|                     | Cd300a  | -0.45            | 3.51E-02 |
|                     | Cd300lb | -0.93            | 8.62E-03 |

Supplemental Table S1- continued

| Enrichment Cluster            | Gene    | log2 Fold Change | P value  |
|-------------------------------|---------|------------------|----------|
| Immunity (24 genes)-continued | Cd300ld | -0.47            | 3.39E-02 |
|                               | Cfi     | -1.16            | 4.46E-05 |
|                               | Clec4n  | -0.67            | 1.61E-02 |
|                               | Clec7a  | -0.51            | 1.70E-02 |
|                               | Dcstamp | -0.83            | 2.85E-02 |
|                               | Ddx58   | -0.19            | 3.18E-02 |
|                               | Eif2ak2 | -0.21            | 2.08E-02 |
|                               | Fcgr1   | -0.43            | 3.71E-02 |
|                               | Fgb     | -1.30            | 4.05E-02 |
|                               | Fgr     | -0.56            | 3.85E-02 |
|                               | Il1f6   | -0.96            | 4.33E-02 |
|                               | Il34    | -0.65            | 3.08E-03 |
|                               | Lbp     | -0.38            | 1.42E-02 |
|                               | Lgals3  | -0.40            | 3.45E-02 |
|                               | Lst1    | -0.50            | 9.65E-03 |
|                               | Mbl1    | -0.84            | 2.09E-02 |
|                               | Nlrp10  | -0.92            | 3.57E-03 |
|                               | Olr1    | -0.89            | 1.19E-02 |
|                               | Smpd3b  | -0.68            | 2.09E-02 |
| Tlr2                          | -0.61   | 4.50E-04         |          |

| Enrichment Cluster  | Gene   | log2 Fold Change | P value  |
|---------------------|--------|------------------|----------|
| Cytokine (14 genes) | Bmp1   | -0.36            | 1.42E-02 |
|                     | Clcf1  | -0.60            | 1.47E-02 |
|                     | Ccl17  | -0.62            | 3.47E-02 |
|                     | Ccl2   | -0.65            | 5.16E-03 |
|                     | Ccl9   | -0.57            | 1.75E-02 |
|                     | Cxcl1  | -1.11            | 4.07E-03 |
|                     | Cxcl14 | -0.33            | 3.01E-04 |
|                     | Cxcl16 | -0.33            | 1.80E-02 |
|                     | Gdf11  | -0.25            | 4.10E-02 |
|                     | Gdf15  | -0.89            | 2.00E-02 |
|                     | Il1f6  | -0.96            | 4.33E-02 |
|                     | Il34   | -0.65            | 3.08E-03 |
|                     | Lif    | -1.02            | 2.08E-03 |
|                     | Spp1   | -0.91            | 6.45E-03 |

**Supplemental Table S2.** DAVID pathway analysis-enriched clusters of up-regulated genes in the kidney samples of Ade + IMC group compared to Ade group

| Enrichment Cluster          | Gene     | log2 Fold Change | P value  |
|-----------------------------|----------|------------------|----------|
| Lipid metabolism (29 genes) | Aacs     | 0.71             | 2.82E-04 |
|                             | Acacb    | 1.02             | 2.42E-02 |
|                             | Acadm    | 0.78             | 1.43E-02 |
|                             | Acadsb   | 0.31             | 4.87E-02 |
|                             | Acs11    | 0.60             | 2.66E-02 |
|                             | Acsm5    | 0.79             | 1.93E-02 |
|                             | Agps     | 0.28             | 3.14E-02 |
|                             | Cers2    | 0.12             | 4.02E-02 |
|                             | Cers4    | 0.26             | 2.20E-02 |
|                             | Cyp51    | 0.66             | 2.58E-02 |
|                             | Echs1    | 0.26             | 4.22E-02 |
|                             | Elovl2   | 0.62             | 3.51E-02 |
|                             | Elovl5   | 0.25             | 1.37E-03 |
|                             | Fa2h     | 0.60             | 3.14E-03 |
|                             | Fads6    | 0.52             | 1.30E-02 |
|                             | Fam57b   | 0.79             | 4.66E-02 |
|                             | Fasn     | 1.90             | 4.39E-02 |
|                             | Gal3st1  | 0.30             | 7.05E-03 |
|                             | Hadhb    | 0.42             | 1.96E-02 |
|                             | Hmgcr    | 0.52             | 3.08E-02 |
|                             | Hpgd     | 0.43             | 3.84E-02 |
|                             | Hsd11b1  | 0.53             | 1.36E-02 |
|                             | Lpl      | 0.89             | 2.03E-04 |
|                             | Lypla1   | 0.35             | 4.87E-02 |
|                             | Mgll     | 0.66             | 1.25E-02 |
|                             | Pla2g12a | 0.28             | 4.50E-02 |
|                             | Pnpla2   | 0.64             | 1.75E-02 |
|                             | Scd1     | 1.68             | 1.21E-02 |
|                             | Sult1a1  | 0.47             | 2.43E-03 |

Supplemental Table S2- continued

| Enrichment Cluster      | Gene   | log2 Fold Change | P value  |
|-------------------------|--------|------------------|----------|
| Mitochondria (75 genes) | Abcc9  | 0.45             | 2.20E-02 |
|                         | Abhd12 | 0.18             | 2.04E-02 |
|                         | Acacb  | 1.02             | 2.42E-02 |
|                         | Acadm  | 0.78             | 1.43E-02 |
|                         | Acadsb | 0.31             | 4.87E-02 |
|                         | Acat2  | 0.39             | 5.25E-03 |
|                         | Acs11  | 0.60             | 2.66E-02 |
|                         | Acsm5  | 0.79             | 1.93E-02 |
|                         | Acyp2  | 0.42             | 2.38E-02 |
|                         | Adcy10 | 1.68             | 3.90E-02 |
|                         | Agps   | 0.28             | 3.14E-02 |
|                         | Alas2  | 1.58             | 8.99E-08 |
|                         | Aldoc  | 0.43             | 9.42E-04 |
|                         | Atg13  | 0.19             | 1.30E-02 |
|                         | Bcat1  | 0.73             | 9.10E-03 |
|                         | Bcat2  | 0.29             | 2.07E-02 |
|                         | Bckdhb | 0.41             | 9.16E-03 |
|                         | Bckdk  | 0.19             | 4.30E-03 |
|                         | Bdh1   | 0.62             | 3.75E-02 |
|                         | Cav1   | 0.41             | 1.81E-02 |
|                         | Cd36   | 0.71             | 5.35E-03 |
|                         | Ckb    | 0.29             | 3.20E-02 |
|                         | Coq9   | 0.30             | 3.36E-02 |
|                         | Cox8b  | 2.03             | 1.67E-02 |
|                         | Dhtkd1 | 0.52             | 2.03E-02 |
|                         | Dmpk   | 0.27             | 3.47E-02 |
|                         | Echdc3 | 0.46             | 1.52E-02 |
|                         | Echs1  | 0.26             | 4.22E-02 |
|                         | Etfa   | 0.31             | 4.28E-02 |
|                         | Fasn   | 1.90             | 4.39E-02 |
|                         | Fbxl4  | 0.21             | 3.91E-02 |
|                         | Ghr    | 0.62             | 3.48E-02 |
|                         | Gtpbp3 | 0.22             | 4.30E-02 |
|                         | Hadhb  | 0.42             | 1.96E-02 |
|                         | Hibch  | 0.44             | 3.92E-03 |
|                         | Hk1    | 0.22             | 4.11E-02 |
|                         | Hsd3b2 | 0.96             | 4.57E-03 |
|                         | Hsd3b3 | 0.44             | 2.89E-02 |
|                         | Hspa1b | 0.28             | 4.55E-02 |

Supplemental Table S2- continued

| Enrichment Cluster                | Gene     | log2 Fold Change | P value  |
|-----------------------------------|----------|------------------|----------|
| Mitochondria (75 genes)-continued | Ivd      | 0.31             | 4.55E-02 |
|                                   | Kyat3    | 0.83             | 1.15E-02 |
|                                   | Lpin1    | 0.40             | 1.38E-02 |
|                                   | Lypla1   | 0.35             | 4.87E-02 |
|                                   | MacroD1  | 0.30             | 4.79E-02 |
|                                   | Mapk10   | 0.81             | 3.42E-02 |
|                                   | Mccc2    | 0.44             | 4.89E-02 |
|                                   | Mcur1    | 0.29             | 3.08E-02 |
|                                   | Mmab     | 0.27             | 1.28E-02 |
|                                   | Mpv17l   | 1.24             | 9.71E-03 |
|                                   | Mrps6    | 0.32             | 9.13E-03 |
|                                   | Mtfr1l   | 0.17             | 4.23E-02 |
|                                   | Mtrf1    | 0.29             | 4.86E-02 |
|                                   | Mtus1    | 0.28             | 1.42E-02 |
|                                   | Nudt19   | 0.77             | 5.80E-04 |
|                                   | Pdk1     | 0.22             | 3.28E-02 |
|                                   | Pink1    | 0.28             | 4.37E-02 |
|                                   | Pmpca    | 0.14             | 3.87E-02 |
|                                   | Ppm1k    | 0.43             | 2.25E-02 |
|                                   | Ptcd2    | 0.22             | 4.44E-02 |
|                                   | Pxmp2    | 0.50             | 2.69E-02 |
|                                   | Rnf185   | 0.19             | 1.42E-02 |
|                                   | Sfxn5    | 0.30             | 3.40E-02 |
|                                   | Slc25a27 | 0.26             | 4.41E-02 |
|                                   | Slc25a35 | 0.30             | 3.09E-02 |
|                                   | Snca     | 1.07             | 2.83E-02 |
|                                   | Stard7   | 0.17             | 3.30E-02 |
|                                   | Sucla2   | 0.35             | 3.73E-02 |
|                                   | Tbrg4    | 0.19             | 2.89E-02 |
|                                   | Tfrc     | 0.41             | 1.59E-02 |
|                                   | Them7    | 0.58             | 2.46E-02 |
|                                   | Tmtc1    | 0.55             | 1.57E-02 |
|                                   | Tst      | 0.39             | 4.66E-02 |
|                                   | Ubiad1   | 0.41             | 2.62E-02 |
|                                   | Ucp3     | 2.08             | 3.34E-02 |
|                                   | Uqcrc2   | 0.27             | 3.50E-02 |

Supplemental Table S2- continued

| Enrichment Cluster       | Gene    | log2 Fold Change | P value  |
|--------------------------|---------|------------------|----------|
| Ion transport (35 genes) | Aqp2    | 0.76             | 6.18E-05 |
|                          | Aqp4    | 1.24             | 2.19E-03 |
|                          | Aqp6    | 0.61             | 9.32E-06 |
|                          | Aspn    | 1.03             | 1.37E-03 |
|                          | Atp1b2  | 0.20             | 4.94E-02 |
|                          | Cacna1g | 0.32             | 4.16E-03 |
|                          | Clcnka  | 0.60             | 1.19E-03 |
|                          | Cldn15  | 0.50             | 1.60E-03 |
|                          | Cnm1    | 0.37             | 1.38E-02 |
|                          | Kcna1   | 1.16             | 2.08E-04 |
|                          | Kcnc3   | 0.62             | 1.31E-02 |
|                          | Kcng1   | 1.44             | 2.06E-02 |
|                          | Kcnh6   | 2.55             | 3.25E-02 |
|                          | Kcnj13  | 1.92             | 3.18E-02 |
|                          | Kcnk2   | 0.46             | 1.72E-02 |
|                          | Kcnk3   | 1.42             | 4.87E-02 |
|                          | Kcnmb2  | 1.99             | 3.37E-02 |
|                          | Kcnq4   | 0.64             | 4.18E-02 |
|                          | Kcnt1   | 1.26             | 8.63E-07 |
|                          | Kctd12b | 0.29             | 2.21E-02 |
|                          | Mcoln3  | 0.30             | 4.24E-02 |
|                          | Mcur1   | 0.29             | 3.08E-02 |
|                          | Sfxn5   | 0.30             | 3.40E-02 |
|                          | Slc12a1 | 0.51             | 2.30E-02 |
|                          | Slc26a7 | 0.68             | 2.71E-02 |
|                          | Slc39a8 | 0.63             | 1.85E-02 |
|                          | Slc4a1  | 0.69             | 7.40E-03 |
|                          | Slc4a5  | 1.28             | 1.62E-05 |
|                          | Slc5a6  | 0.66             | 2.54E-03 |
|                          | Slc6a15 | 1.42             | 6.40E-05 |
|                          | Slc9a8  | 0.70             | 2.37E-02 |
|                          | Tmco3   | 0.37             | 2.09E-02 |
|                          | Tmem109 | 0.23             | 8.02E-03 |
|                          | Tmem38b | 0.31             | 1.57E-02 |
|                          | Trpm1   | 1.21             | 3.27E-03 |



Supplemental Table S2- continued

| Enrichment Cluster               | Gene     | log2 Fold Change | P value  |
|----------------------------------|----------|------------------|----------|
| Endoplasmic reticulum (59 genes) | Acs1     | 0.60             | 2.66E-02 |
|                                  | Amfr     | 0.26             | 8.01E-03 |
|                                  | Ano5     | 0.65             | 1.10E-02 |
|                                  | Aoc3     | 0.70             | 1.16E-02 |
|                                  | Apmap    | 0.37             | 4.42E-02 |
|                                  | Apod     | 1.12             | 1.16E-02 |
|                                  | Cav1     | 0.41             | 1.81E-02 |
|                                  | Cd36     | 0.71             | 5.35E-03 |
|                                  | Cdnf     | 1.06             | 6.28E-03 |
|                                  | Cers2    | 0.12             | 4.02E-02 |
|                                  | Cers4    | 0.26             | 2.20E-02 |
|                                  | Ces1f    | 0.47             | 2.84E-02 |
|                                  | Clcnka   | 0.60             | 1.19E-03 |
|                                  | Col4a3   | 0.37             | 4.91E-02 |
|                                  | Colgalt2 | 0.47             | 2.13E-02 |
|                                  | Cyp51    | 0.66             | 2.58E-02 |
|                                  | Dio1     | 0.73             | 3.09E-02 |
|                                  | Dmpk     | 0.27             | 3.47E-02 |
|                                  | Elovl2   | 0.62             | 3.51E-02 |
|                                  | Elovl5   | 0.25             | 1.37E-03 |
|                                  | Fa2h     | 0.60             | 3.14E-03 |
|                                  | Fam57b   | 0.79             | 4.66E-02 |
|                                  | Fibin    | 0.69             | 2.03E-02 |
|                                  | Hadhb    | 0.42             | 1.96E-02 |
|                                  | Herpud1  | 0.34             | 4.00E-02 |
|                                  | Hmgcr    | 0.52             | 3.08E-02 |
|                                  | Hpd      | 1.47             | 1.97E-02 |
|                                  | Hsd11b1  | 0.53             | 1.36E-02 |
|                                  | Hsd3b2   | 0.96             | 4.57E-03 |
|                                  | Hsd3b3   | 0.44             | 2.89E-02 |
|                                  | Itga8    | 0.45             | 3.23E-02 |
|                                  | Kcna1    | 1.16             | 2.08E-04 |
|                                  | Kcnk2    | 0.46             | 1.72E-02 |
|                                  | Lpin1    | 0.40             | 1.38E-02 |
| Mfsd2a                           | 1.30     | 2.38E-03         |          |
| Myo5a                            | 0.46     | 1.11E-02         |          |
| Nat8                             | 0.87     | 6.52E-04         |          |
| Nat8f6                           | 0.91     | 4.43E-02         |          |
| Notch4                           | 0.33     | 2.49E-02         |          |

**Supplemental Table S2-** continued

| <b>Enrichment Cluster</b>                         | <b>Gene</b> | <b>log2 Fold Change</b> | <b>P value</b> |
|---------------------------------------------------|-------------|-------------------------|----------------|
| <b>Endoplasmic reticulum (59 genes)-continued</b> | Nr3c2       | 0.29                    | 4.36E-02       |
|                                                   | Ormdl3      | 0.35                    | 1.09E-02       |
|                                                   | Pla2g12a    | 0.28                    | 4.50E-02       |
|                                                   | Ptpn5       | 1.19                    | 5.34E-03       |
|                                                   | Ric3        | 0.66                    | 3.15E-03       |
|                                                   | Rnf185      | 0.19                    | 1.42E-02       |
|                                                   | Sar1b       | 0.28                    | 2.15E-02       |
|                                                   | Scd1        | 1.68                    | 1.21E-02       |
|                                                   | Shisa2      | 0.72                    | 1.05E-02       |
|                                                   | Sil1        | 0.21                    | 3.62E-02       |
|                                                   | Tenm2       | 0.49                    | 4.07E-02       |
|                                                   | Tgfbr3      | 0.39                    | 1.36E-02       |
|                                                   | Thbs4       | 0.92                    | 4.73E-03       |
|                                                   | Tmem100     | 1.62                    | 2.07E-04       |
|                                                   | Tmem109     | 0.23                    | 8.02E-03       |
|                                                   | Tmem119     | 0.38                    | 2.54E-02       |
|                                                   | Tmem189     | 0.38                    | 1.68E-02       |
|                                                   | Tmem38b     | 0.31                    | 1.57E-02       |
|                                                   | Tmem50b     | 0.17                    | 3.10E-02       |
| Ubiad1                                            | 0.41        | 2.62E-02                |                |

| <b>Enrichment Cluster</b>                   | <b>Gene</b> | <b>log2 Fold Change</b> | <b>P value</b> |
|---------------------------------------------|-------------|-------------------------|----------------|
| <b>Cellular water homeostasis (6 genes)</b> | Aqp1        | 0.40                    | 3.44E-02       |
|                                             | Aqp2        | 0.76                    | 6.18E-05       |
|                                             | Aqp3        | 0.49                    | 1.03E-02       |
|                                             | Aqp4        | 1.24                    | 2.19E-03       |
|                                             | Aqp6        | 0.61                    | 9.32E-06       |
|                                             | Slc6a12     | 0.54                    | 3.26E-02       |

**Supplemental Table S3.** qPCR primers used in this study

| Primer         | Sequence                 |
|----------------|--------------------------|
| c-ATF4-F       | CTTGATGTCCCCCTTCGACC     |
| c-ATF4-R       | GGCATCCTCCTTTCCGTTGT     |
| c-CCL20-F      | CATGGGCTTCACACAACAGC     |
| c-CCL20-R      | CTATGGCTGAGGAGACGCAC     |
| c-CCL2-F       | TCCCAAAGAAGCTGTGATCTTCA  |
| c-CCL2-R       | TTTGCAGTTTGGGTTTGGCT     |
| c-CHOP/DDIT3-F | CAACGAGGCTCTAAGGTCCG     |
| c-CHOP/DDIT3-R | TACAGTTGGATCAGGCTCTGC    |
| c-GAPDH-F      | TTCCACGGCACAGTCAAG       |
| c-GAPDH-R      | ACTCAGCACCAGCATCAC       |
| c-IL1A-F       | TGAAGCCCAGATCAGTAGCA     |
| c-IL1A-R       | CTCCCATGTCAAACCTTCACTGC  |
| c-IL8-F        | ACAGTGGCCACATTGTGAA      |
| c-IL8-R        | GGATCTTGTTTCTCAGCCTTCTT  |
| h-B2M-F        | AGATGAGTATGCCTGCCGTG     |
| h-B2M-R        | TCATCCAATCCAAATGCGGC     |
| h-CCL2-F       | TGCTCATAGCAGCCACCTTCA    |
| h-CCL2-R       | GACACTTGCTGCTGGTGATTC    |
| h-IL6-F        | TTCAATGAGGAGACTTGCCTG    |
| h-IL6-R        | CTGGCATTGTGGTTGGGTC      |
| h-IL8-F        | TCTCTTGGCAGCCTTCCTGATTC  |
| h-IL8-R        | GTGTGGTCCACTCTCAATCACTCT |
| h-TNF-a-F      | GCTGCACTTTGGAGTGATCG     |
| h-TNF-a-R      | CTTGCACTCGGGTTCGAG       |

| Primer         | Sequence                    |
|----------------|-----------------------------|
| m-Ccl2-F       | CACTCACCTGCTGCTACTCA        |
| m-Ccl2-R       | GCTTGGTGACAAAACTACAGC       |
| m-Ccl20-F      | CCAGGCAGAAGCAAGCAACTA       |
| m-Ccl20-R      | TTTGATCAGCGCACACAGA         |
| m-Col1a1-F     | GAGAGGTGAACAAGTCCCG         |
| m-Col1a1-R     | AAACCTCTCTCGCCTCTTGC        |
| m-Col3a1-F     | GAGGAATGGGTGGCTATCCG        |
| m-Col3a1-R     | TCGTCCAGGTCTTCCTGACT        |
| m-Cox2/Ptgs2-F | TTCAACACACTCTATCACTGGC      |
| m-Cox2/Ptgs2-R | AGAAGCGTTTGCGGTACTCAT       |
| m-Eif2a-F      | CAACGTGGCAGCCTTACA          |
| m-Eif2a-R      | TTTCATGTCATAAAGTTGTAGGTTAGG |
| m-Il6-F        | CAACGATGATGCACCTGCAGA       |
| m-Il6-R        | TGGAAATTGGGGTAGGAAGGAC      |
| m-Lcn2-F       | GGAACGTTTCACCCGCTTTG        |
| m-Lcn2-R       | CATTGGTCGGTGGGGACAGA        |
| m-Rpl13a-F     | CCCTCCACCCTATGACAAGA        |
| m-Rpl13a-R     | TTCTCCTCCAGAGTGGCTGT        |
| m-Vcam1-F      | TGGAGGTCTACTCATTCCTGA       |
| m-Vcam1-R      | GACAGGTCTCCCATGCACAA        |

Primers from various species are designated as: c: canine, h: human, m: mouse

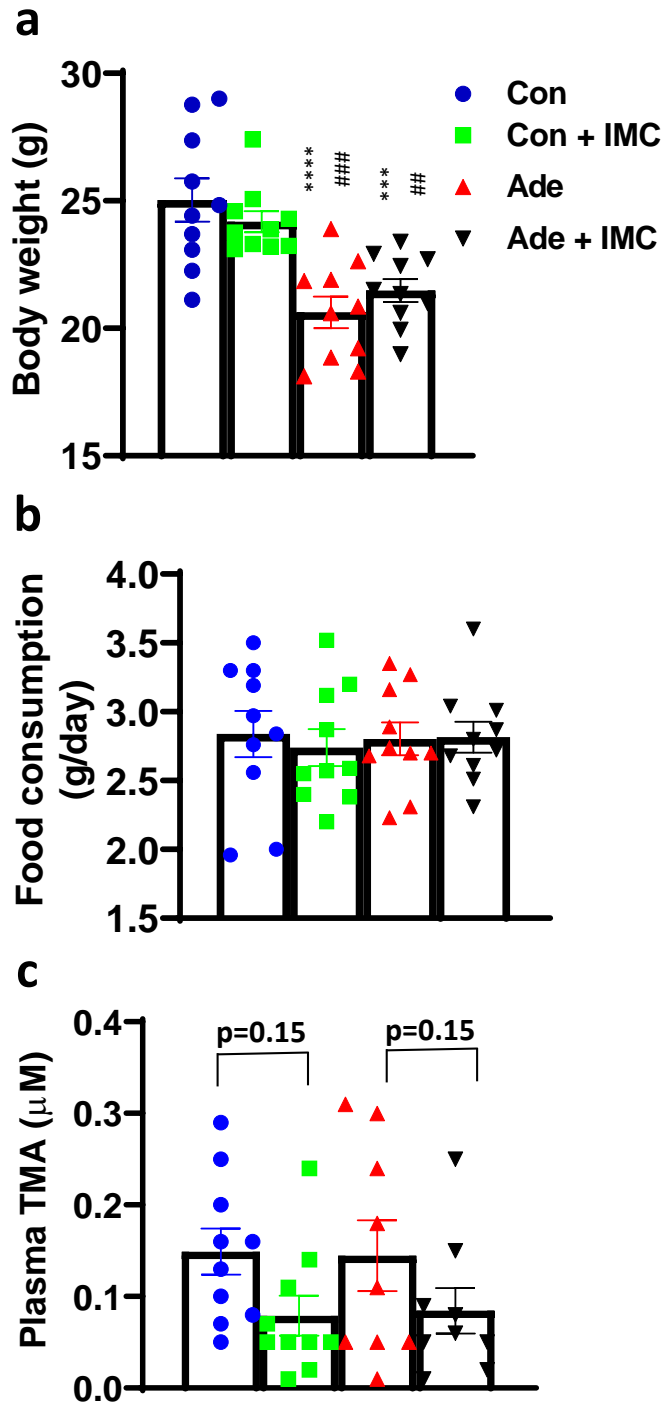

**Supplemental Figure S1. Body weight (a), food consumption (b), and plasma TMA (c) data of mice included in this study.** Data were obtained from the same mice described in Figure 1. Sample sizes were  $n = 10/\text{group}$  for (a) and (b), and  $n = 9\text{-}10/\text{group}$  for (c). Post hoc analysis was performed after significant two-way ANOVA. For (a) Symbols: \*\*\*:  $P < 0.001$ , \*\*\*\*:  $P < 0.0001$  compared to control (Con) group. #:  $P < 0.01$ , ####:  $P < 0.001$  compared to control (Con) + IMC group.

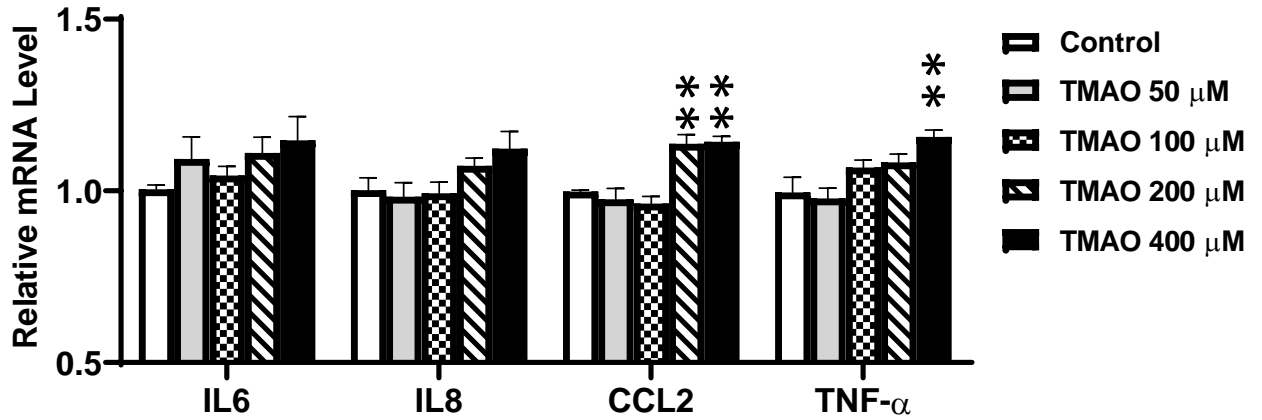

**Supplemental Figure S2. TMAO treatment induces the expression of inflammatory genes in normal human primary renal proximal tubule epithelial cells, RPTEC.** RPTEC cells were treated with control media or media containing various doses of TMAO (n = 4/group) for 48 hours before examination of gene expression by qPCR. Post hoc Tukey's multiple comparisons test was performed after significant one-way ANOVA. Symbol: \*\*: p < 0.01 as compared to the control group.

## **Supplemental Information: Full length, uncropped Images of WB in the Manuscript**

**Title:** Inhibition of microbiota-dependent TMAO production attenuates chronic kidney disease in mice

### **Authors**

Wenchao Zhang, Aika Miikeda, Jonathan Zuckerman, Xun Jia, Sarada Charugundla, Zhiqiang Zhou, Karolina Elżbieta Kaczor-Urbanowicz, Clara Magyar, Fangfei Guo, Zeneng Wang, Matteo Pellegrini, Stanley L. Hazen, Susanne B. Nicholas, Aldons J. Lulis, and Diana M. Shih

### **Description**

In the supplemental information, the original images of Figure 2e are shown without “auto-contrast adjustment” of Adobe Photoshop software.

Figure 2e (uncropped images)

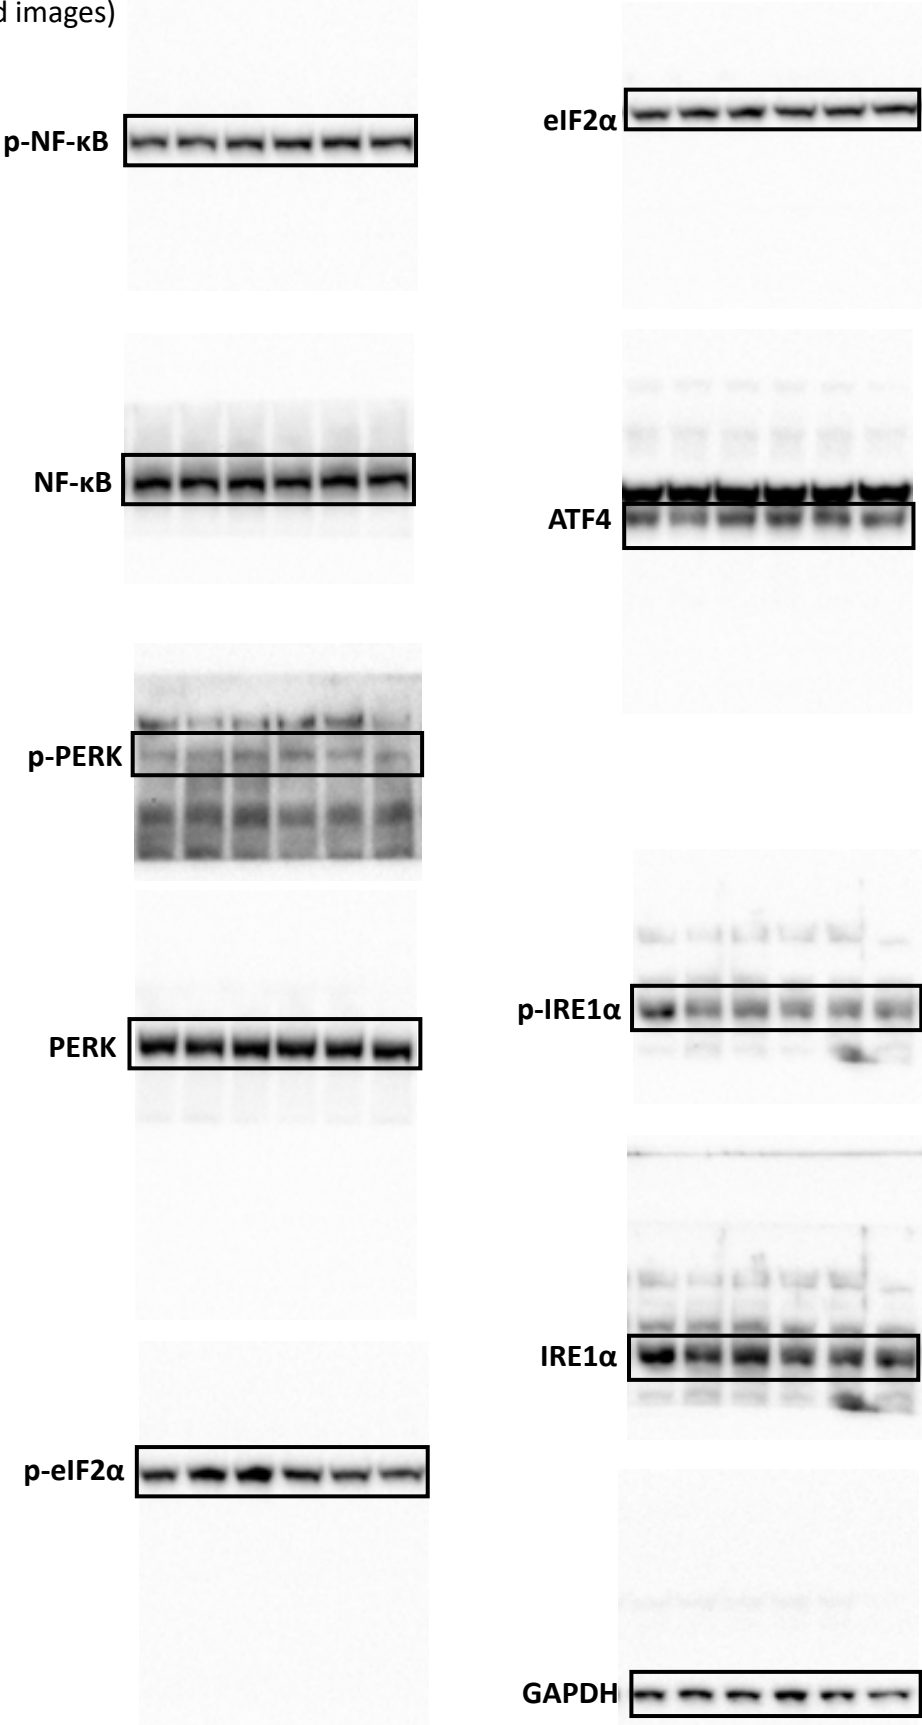

Supplement: 41598_2020_80063_MOESM1_ESM.pdf [file 41598_2020_80063_MOESM1_ESM.pdf]
